# Supplementary material for: Minute-made and low carbon fingerprint microwave synthesis of high quality templated mesoporous silica
Source: Royal Society of Chemistry journal article supplement (doi:10.1039/c5gc00038f), 2015-01-01
Supplement: c5gc00038f1.pdf [file c5gc00038f1.pdf]

## Electronic Supplementary Information

### Minute-made and low carbon fingerprint microwave synthesis of high quality templated mesoporous silica

*J. Chaignon, Y. Bouizi, L. Davin, N. Calin, B. Albela, L. Bonneviot\**

**Table S1.** Experimental conditions of the preliminary survey series of microwave syntheses.

| Sample | addition <sup>a</sup> | Preliminary    | Ramp t | Plateau |      | Cooling <sup>b</sup> | Total <sup>c</sup> (min) |
|--------|-----------------------|----------------|--------|---------|------|----------------------|--------------------------|
|        |                       | plateau        | (min)  | t       | T    | bath T               |                          |
|        |                       | T (°C)/t (min) |        | (min)   | (°C) | (°C)                 |                          |
| MTM-01 | S                     | none           | 20     | 40      | 130  | RT                   | 240                      |
| MTM-02 | F                     | 60 /10         | 10     | 40      | 130  | RT                   | 180                      |
| MTM-03 | F                     | 60/10          | 10     | 20      | 130  | RT                   | 160                      |
| MTM-04 | F                     | none           | 1      | 14      | 130  | RT                   | 125                      |
| MTM-05 | F                     | none           | 1      | 9       | 130  | I                    | 80                       |

a) S = Slow, drop wise addition followed by a 1 h stirring, F = Fast, addition on the edge of the beaker before putting the mixture in the autoclave, b) RT = Room Temperature, cooled at room temperature, I = Ice-bath, cooled in a ice-bath, c) Includes surfactant dissolution, heating and cooling before solid recovery.

**Table S2.** Q<sup>4</sup> silicon proportion of selected silica materials.

| Sample    | $\delta$ (ppm) / Q <sup>4</sup> (%) |
|-----------|-------------------------------------|
| MTC-E-130 | 110.6 / 58.3                        |
| MTC-E-170 | 110.8 / 66.0                        |
| MTM-E-130 | 109.8 / 57.9                        |
| MTM-E-170 | 109.9 / 58.9                        |

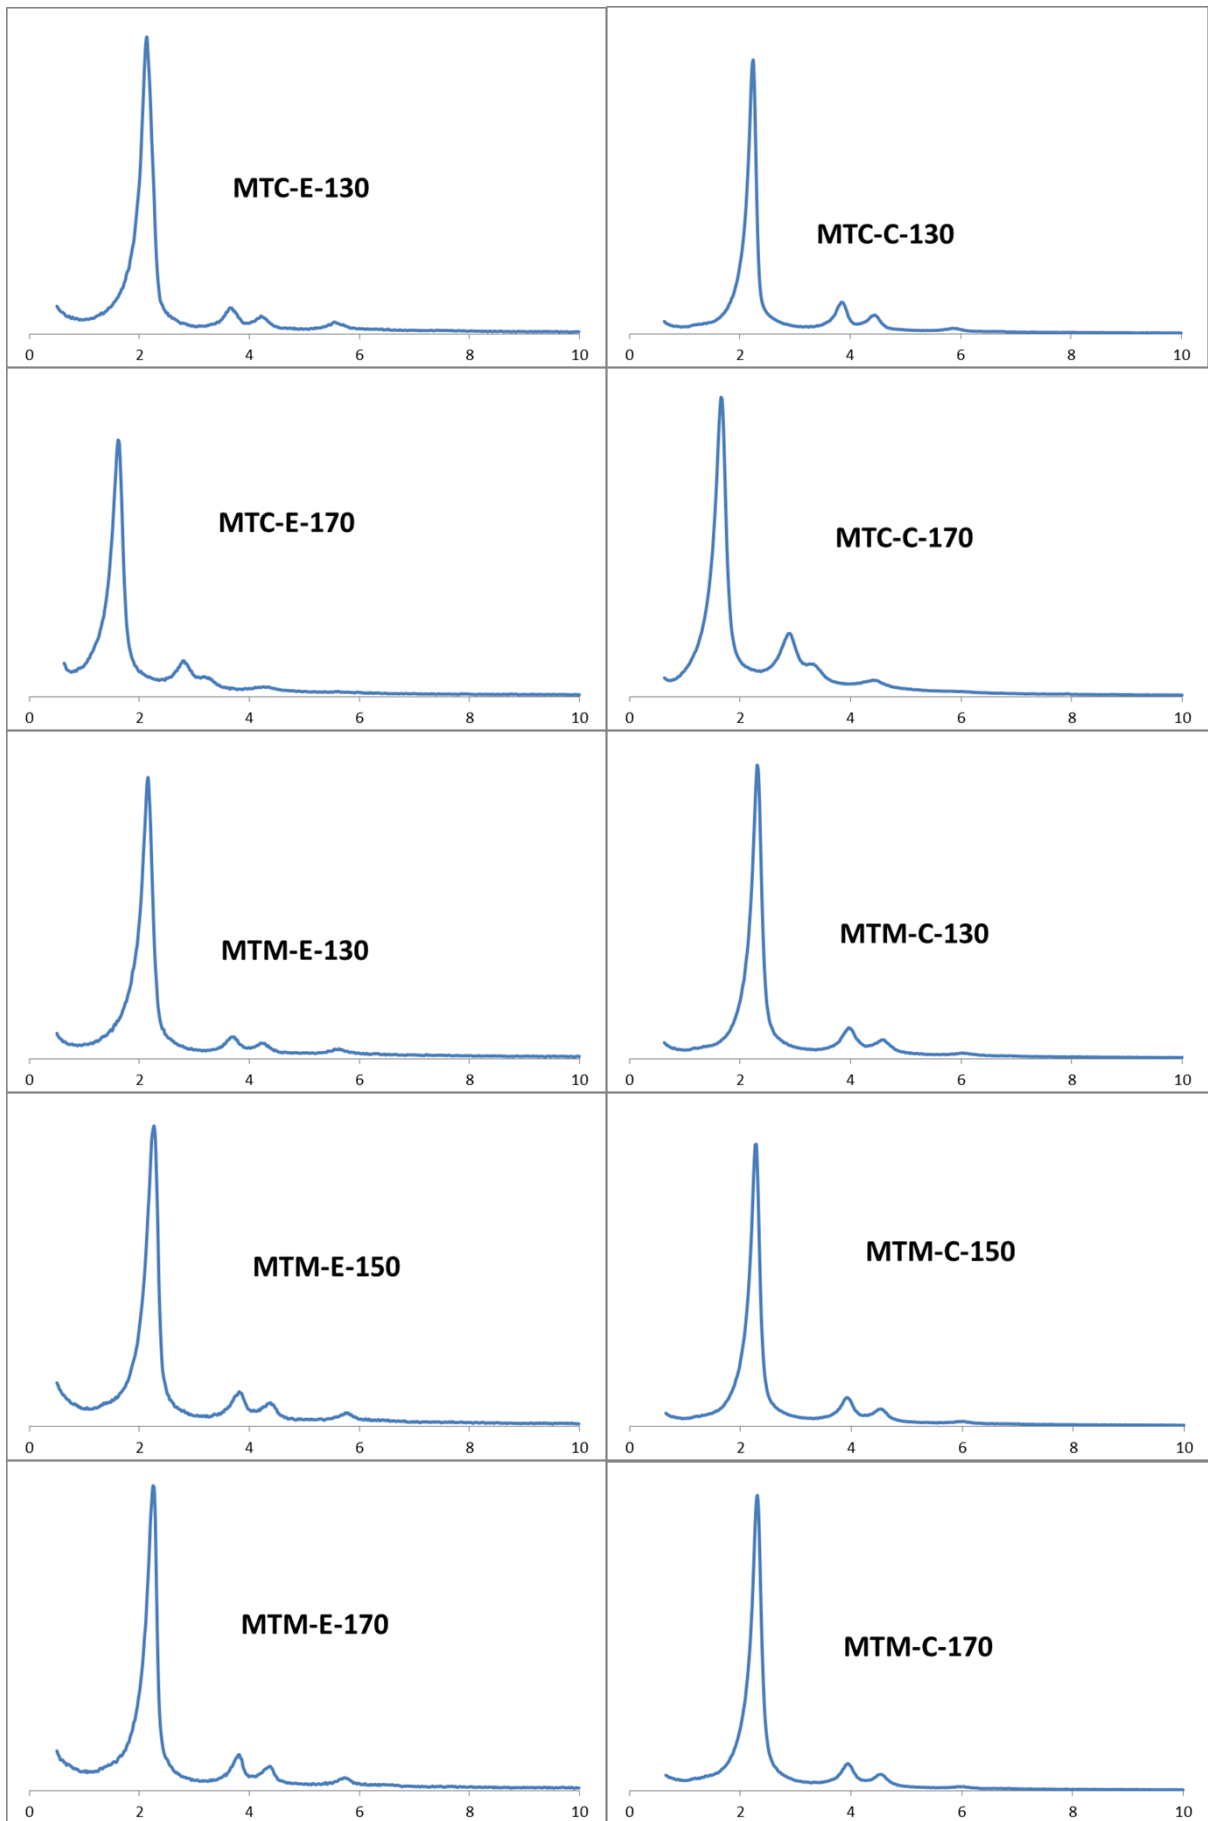

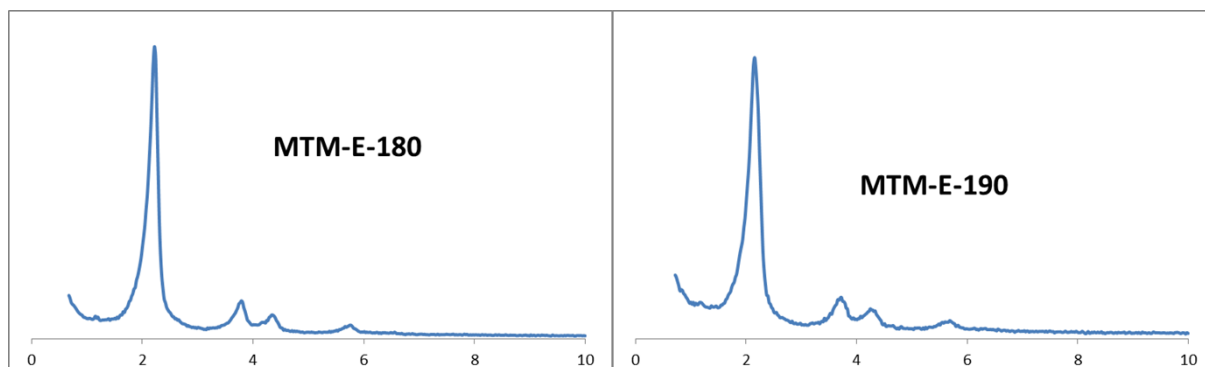

**Figure S1.** Diffraction patterns of several extracted silicas (x-axis is  $2\theta$  in degrees).

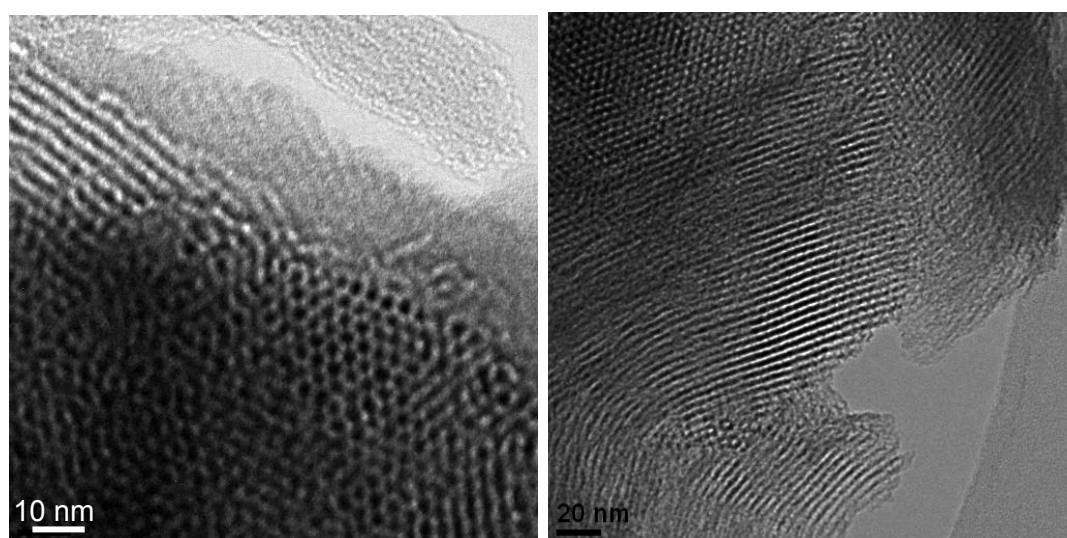

**Figure S2.** TEM pictures of MTM-01 silica.

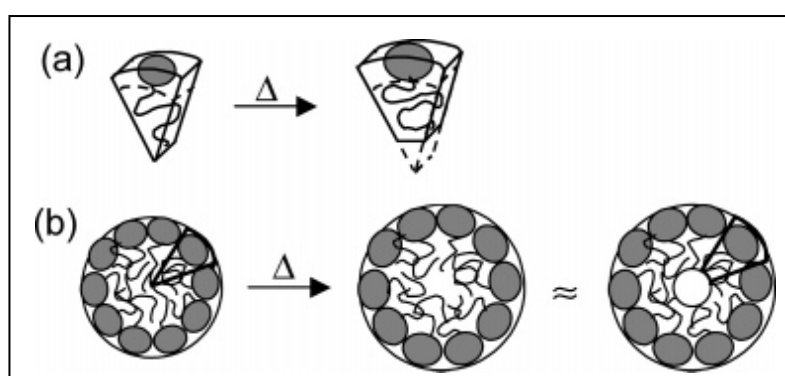

**Figure S3.** Thermal effect on micelle swelling using Israelachvili model according to Tolbert et al. *Langmuir* **2005**, *21*, 470: a) dynamic long chain longitudinal shortening and transversal broadening, b) effect on micelle size.

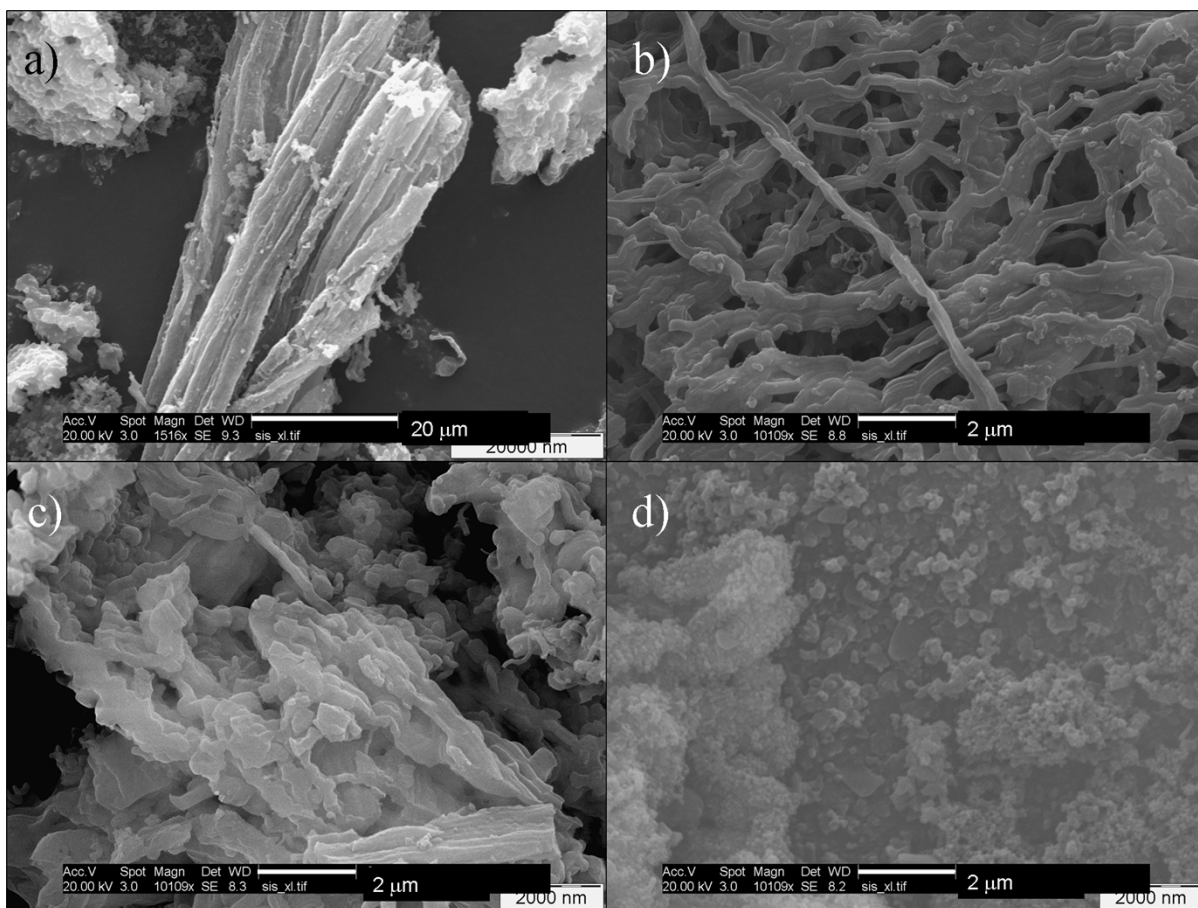

**Figure S4.** SEM pictures of MTC-130 (a), MTM-130 (b), MTM-150 (c) and MTM-170 (d).

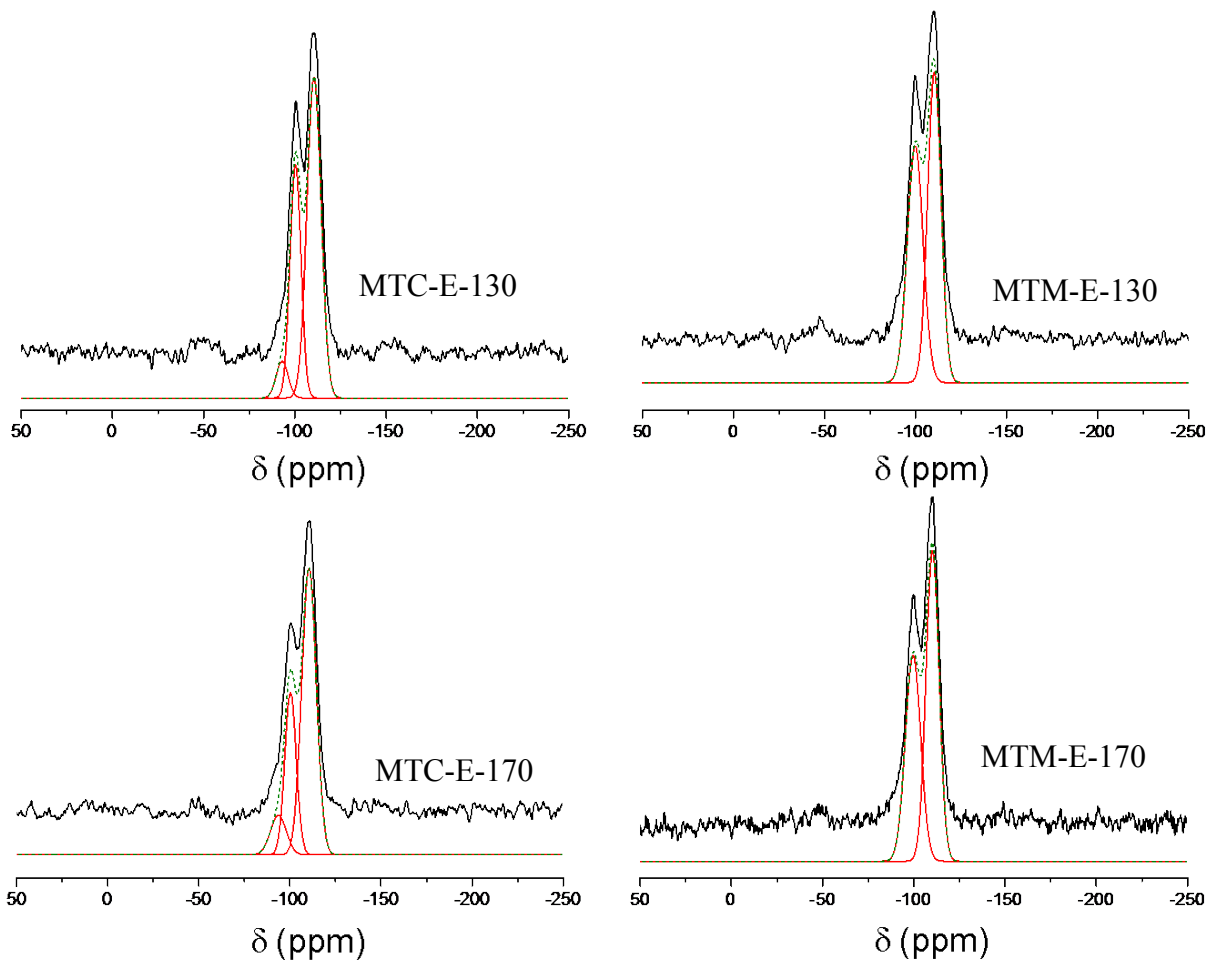

**Figure S5.**  $^{29}\text{Si}$  HPDEC NMR spectra (black line), simulation (red line) and deconvolution (green dotted line) of classical and microwave materials.  $Q^2$  percentage was omitted due to the lack of precision given by the fitting curve.

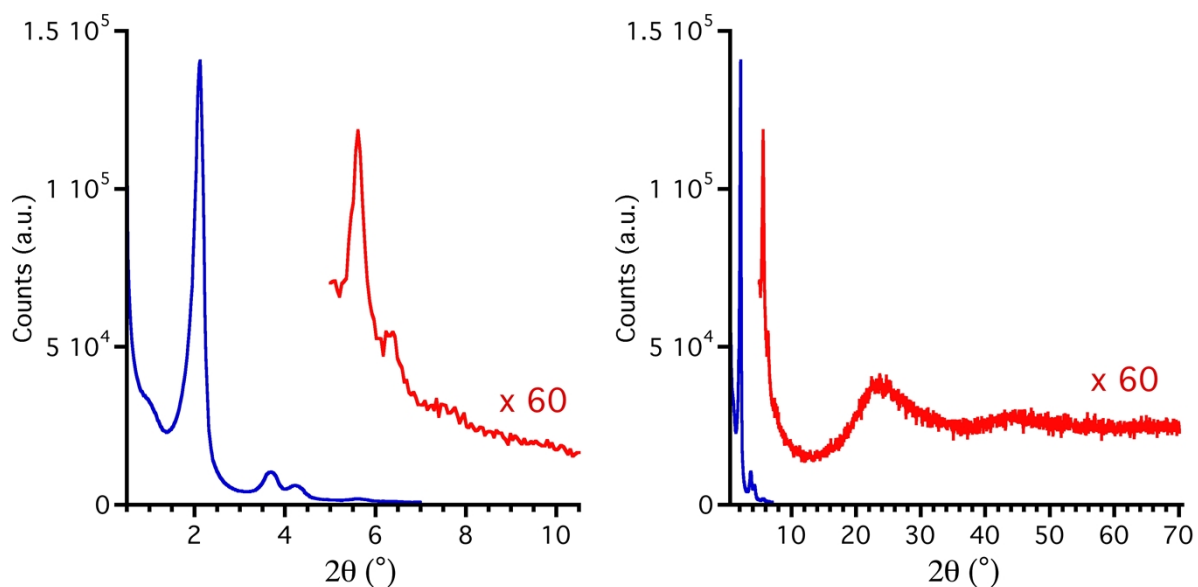

**Figure S6.** XRD Powder diagram of MTM-190-10 at low and large angles. The blue lines are at the scale given by the vertical axis and measured between  $0.5$  to  $7^\circ$  while the red lines are measured between  $5$  to  $70^\circ$  in  $2\theta$  and reported with an intensity multiplied by  $60$ . The narrow peak are diffraction due to the hexagonal phase as shown in Figure S1. The broad peak at  $22^\circ$  and  $44^\circ$  are typical of diffusion assigned to Si-Si distances in amorphous the  $\text{SiO}_2$  phase of the channel wall.
